# Supplementary material for: Trends and annual cycles in soundings of Arctic tropospheric ozone
Source: Copernicus journal article supplement (doi:10.5194/acp-17-9347-2017), 2017-08-04
Supplement: Supplementary file 1 [file acp-17-9347-2017-supplement.pdf]

Supplement of Atmos. Chem. Phys., 17, 9347–9364, 2017  
<https://doi.org/10.5194/acp-17-9347-2017-supplement>  
© Author(s) 2017. This work is distributed under  
the Creative Commons Attribution 3.0 License.

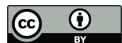

*Supplement of*

## **Trends and annual cycles in soundings of Arctic tropospheric ozone**

**Bo Christiansen et al.**

*Correspondence to:* Bo Christiansen (boc@dmi.dk)

The copyright of individual parts of the supplement might differ from the CC BY 3.0 License.

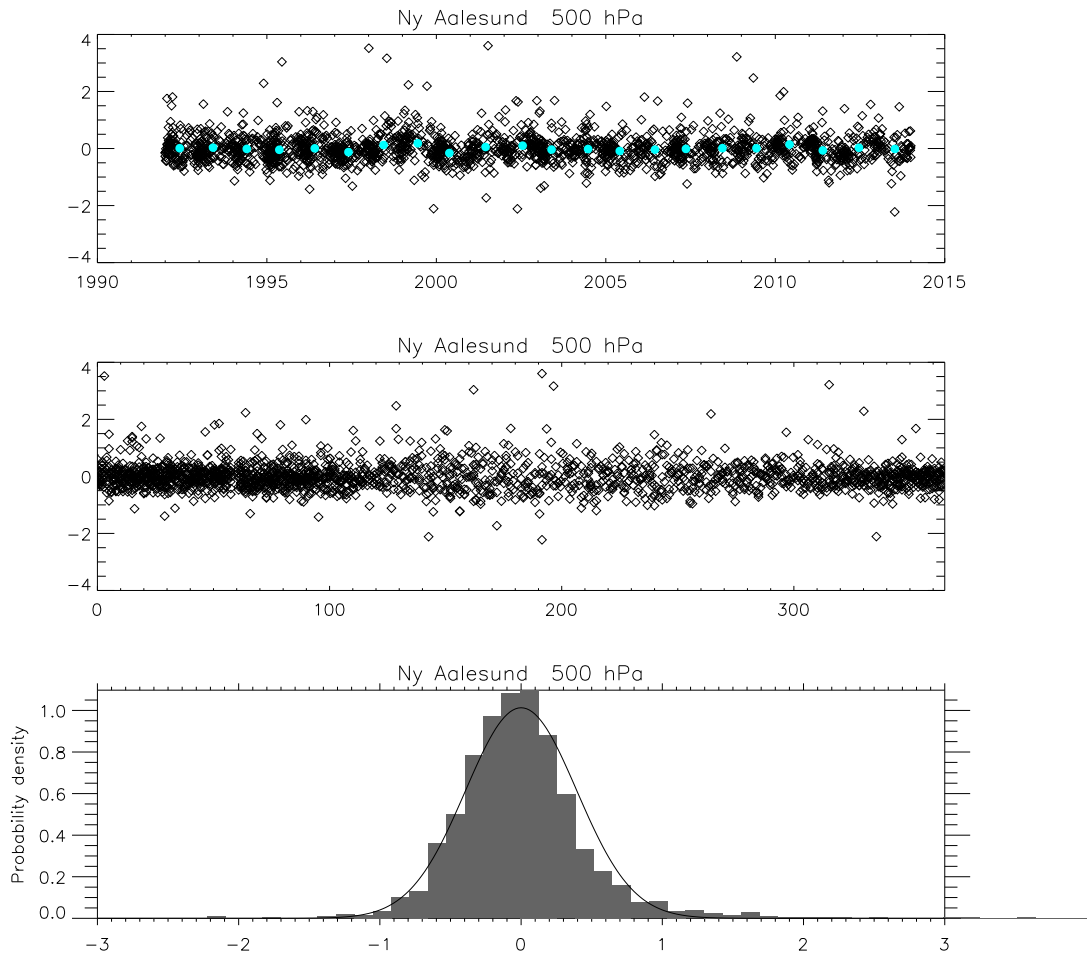

Figure S1: Residuals for Ny Aalesund at 500 hPa. Upper panel: residuals as function of time. Cyan circles are annual means. Middle panel: residuals as function of day of year. Lower panel: histogram of the residuals. Full curve is best Gaussian fit. Model settings:  $n_{pol} = 4$ ,  $n_{cyc} = 2$ ,  $n_{tr}^a = n_{tr}^\theta = 0$  and white noise.

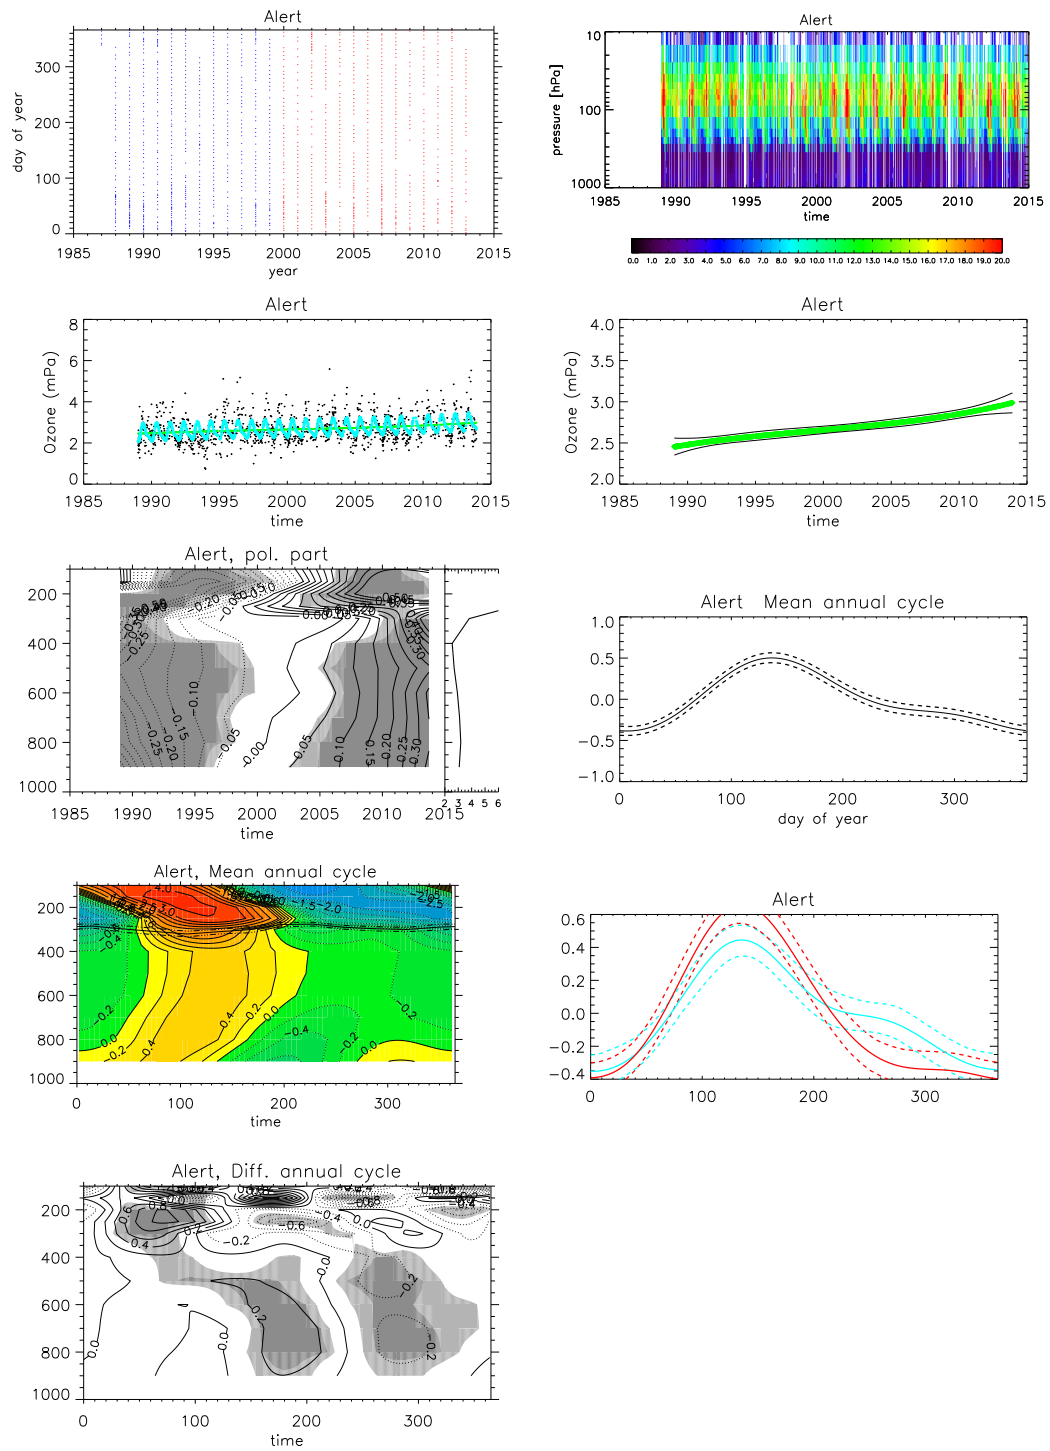

Figure S2: Results from Alert. See Figs. 2, 3, 4, 5, 7, 8, 9, 10, and 11 in the main text for descriptions.

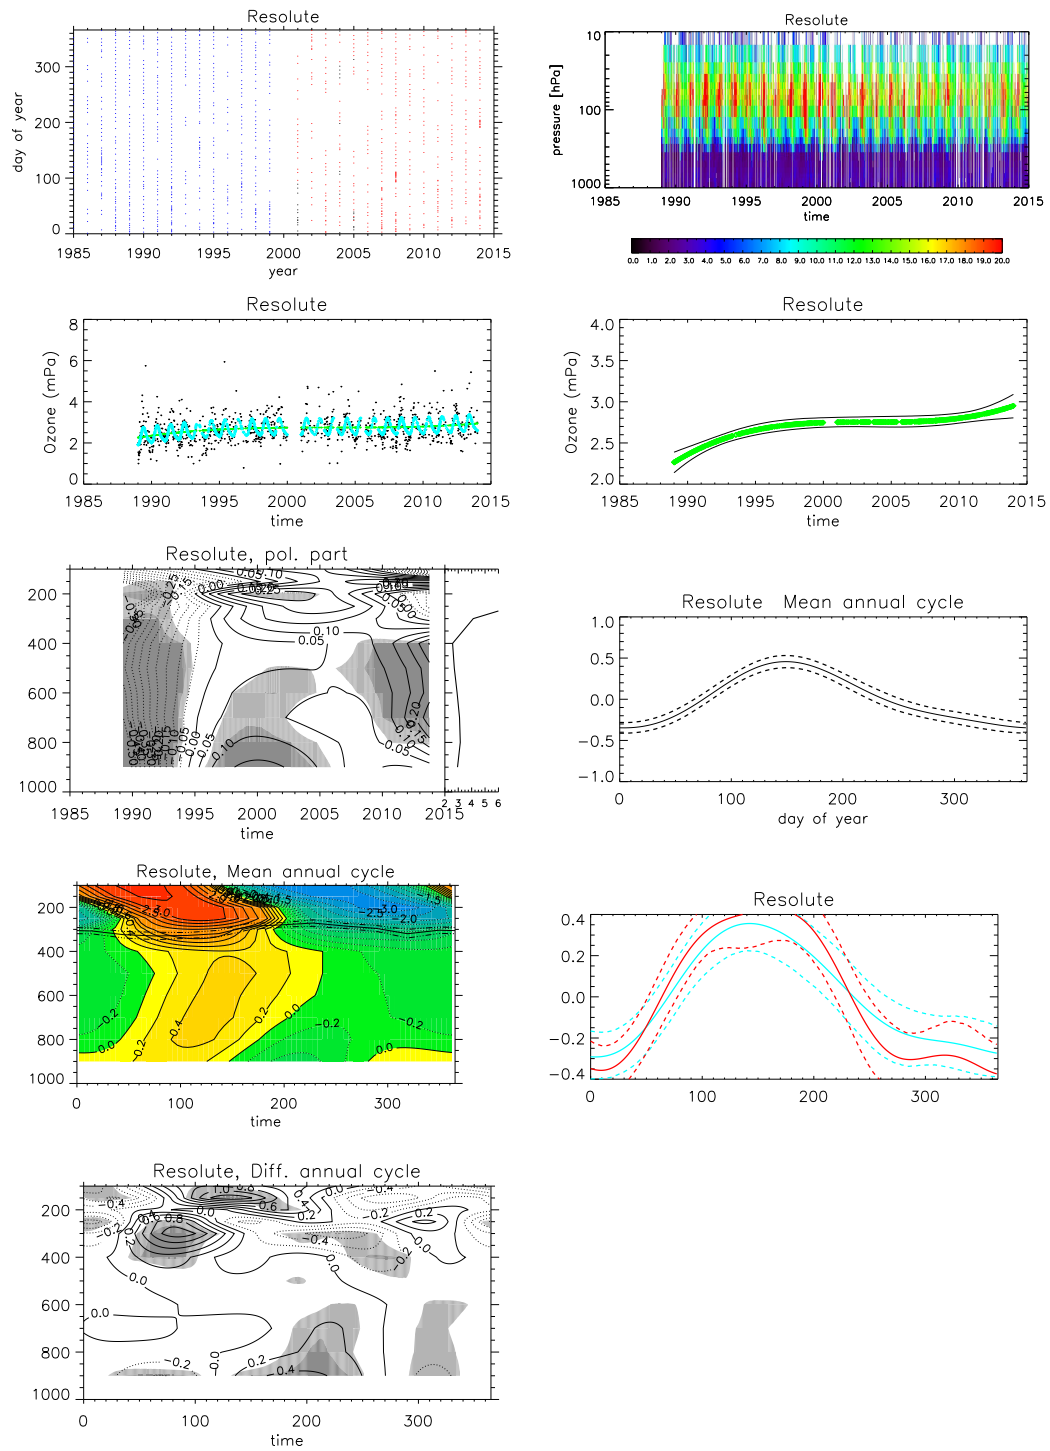

Figure S3: Results from Resolute. See Figs. 2, 3, 4, 5, 7, 8, 9, 10, and 11 in the main text for descriptions.
